# Supplementary material for: The Role of RelA and SpoT on ppGpp Production, Stress Response, Growth Regulation, and Pathogenicity in Xanthomonas campestris pv. campestris
Source: PubMed Central journal article supplement (PMC8693919; doi:10.1128/spectrum.02057-21), 2021-12-22
Supplement: spectrum02057-21_supp_1_seq9.pdf [file spectrum02057-21_supp_1_seq9.pdf]

## Supplemental data

**Table S1 Proteins exhibiting homology with the RSH ppGpp synthetase domains in *Xanthomonas campestris* pv. *campestris* 8004**

**Table S2 Primers used for the construction and verification of the  $\Delta relA$  and  $\Delta relA\Delta spoT$  mutants and complementation strains**

Underlined nucleotides indicate the location of restriction sites used for cloning

**Table S3 Primers used for qPCR analysis in the current study**

**Figure S1 Predicted domains within the RelA and SpoT homologues in *Xanthomonas campestris* pv. *campestris*.** Bioinformatic analysis using the InterPro online tool indicated that both proteins contained the ppGpp synthetase domain as well as other characteristic motifs of long RelA/SpoT homologue (RSH) proteins: HD, hydrolysis domain; SYNTH, synthesis domain; TGS, ThrRS (threonyl tRNA synthetase), GTPase, and SpoT; ACT, aspartokinase, chorismate mutase, and TyrA (prephenate dehydrogenase). The terms NTD and CTD indicate the amino-terminal domain and carboxy-terminal domain, respectively, while numbers indicate the amino acid location within the protein.

**Figure S2 Gene expression of *relA* and *spoT* in *Xanthomonas campestris* pv. *campestris* deletion mutants and complementation strains during log-phase growth.** The bar charts indicate the *relA* (A) and *spoT* (B) relative expression of mutant strains in comparison to wild-type strain. WT,  $\Delta relA$ , and  $\Delta relA\Delta spoT$  indicate the wild-type, single mutant and double mutant, respectively, while the prefix pL3- indicates control strains used during complementation, and the suffixes (*relA*) and (*spoT*) indicate complementation with functional copies of *relA* and *spoT*, respectively. Bars correspond to one standard deviation (SD) from the mean (n = 3).

**Table S1 Proteins exhibiting homology with the RSH ppGpp synthetase domains in**

***Xanthomonas campestris* pv. *campestris* 8004**

| Query sequence                        | Gene ID (NCBI)  | Sequence identity (%) | Functional annotation                       | P value  |
|---------------------------------------|-----------------|-----------------------|---------------------------------------------|----------|
| RelA<br>ppGpp<br>synthetase<br>domain | XC_RS05900      | 100                   | Bifunctional (p)ppGpp                       | 7.00E-92 |
|                                       | ( <i>relA</i> ) |                       |                                             |          |
|                                       | XC_RS04795      | 52.71                 | Synthetase/guanosine-3',5'-bis(diphosphate) | 6.00E-36 |
|                                       | ( <i>spoT</i> ) |                       |                                             |          |
|                                       | XC_RS07530      | 28.26                 | Ribonuclease G                              | 2        |
|                                       | XC_RS15935      | 29.55                 | EAL domain-containing protein               | 2.6      |
|                                       | XC_RS08665      | 24.53                 | TonB-dependent receptor                     | 4.9      |
| SpoT<br>ppGpp<br>synthetase<br>domain | XC_RS04795      | 100                   | Synthetase/guanosine-3',5'-bis(diphosphate) | 6.00E-88 |
|                                       | ( <i>spoT</i> ) |                       |                                             |          |
|                                       | XC_RS05900      | 53.6                  | Bifunctional (p)ppGpp                       | 2.00E-35 |
|                                       | ( <i>relA</i> ) |                       |                                             |          |
|                                       | XC_RS21215      | 45.45                 | Alpha-glucuronidase                         | 2        |
|                                       | XC_RS04155      | 32.65                 | Membrane protein                            | 3.2      |
|                                       | XC_RS00865      | 42.31                 | Amino acid ABC transporter permease         | 3.5      |
|                                       | XC_RS16350      | 34.69                 | Recombination protein RecR                  | 3.5      |

**Table S2 Primers used for the construction and verification of the  $\Delta relA$  and  $\Delta relA\Delta spoT$  mutants and complementation strains**

| Target gene | Primer        | Sequence (5'→3')                   | Restriction site | Product size (bp) | Annealing temperature (°C) |
|-------------|---------------|------------------------------------|------------------|-------------------|----------------------------|
| <i>hrpF</i> | DLH120        | CCGTAGCACTTAGTGCAATG               |                  | 619               | 60                         |
|             | DLH125        | GCATTTCATCGGTCACGATTG              |                  |                   |                            |
| <i>spoT</i> | XccSpoTF8-F   | ATGACCATGATTACGACACTCCGCCCTTTCC    |                  | 500               | 70                         |
|             | XccSpoTF8-R   | CAGTGATGCGCGCGGGCCGGAAGACTATGCCAG  |                  |                   |                            |
|             | XccSpoTF10-F  | CCGCGCGCATCACTGCGGCGCATGTCGGCGCAG  |                  | 500               | 70                         |
|             | XccSpoTF10-R  | TGCATGCCTGCAGGTGACCAGCAACCGCTGGTC  |                  |                   |                            |
|             | XccSpoTF7E-F  | CGGAATTCACACTCCGCCCTTTCC           | <i>EcoRI</i>     | 1000              | 70                         |
|             | XccSpoTF9H-R  | CCAAGCTTGACCAGCAACCGCTGGTC         | <i>HindIII</i>   |                   |                            |
|             | XccspoT-F     | TCTGCAACTCAAGGAGATGGTC             |                  | 3425              | 60                         |
|             | XccspoT-R     | GGCTGATTCCAAAGGAAACTGA             |                  |                   |                            |
|             | XccspoT1-F    | AAATTCCGACGCCAGTTCTTC              |                  | 142               | 56                         |
|             | XccspoT1-R    | CGAGCCCTACATCACCCATCC              |                  |                   |                            |
|             | XccspoTHB2B-F | CGGGATCCTCCAAAGGAAACTGAATAAGCG     | <i>BamHI</i>     | 2747              | 62                         |
|             | XccspoTHB2H-R | CCAAGCTTACATGCGCCGCAGTGAT          | <i>HindIII</i>   |                   |                            |
| <i>relA</i> | XccRelAF8-F   | AGTCGGTACCCGGGGTGGCAATCCACTGCGG    |                  | 500               | 70                         |
|             | XccRelAF8-R   | GAAGACTGCGTGCGCAAAGGCGGCAGGGACATG  |                  |                   |                            |
|             | XccRelAF10-F  | GCGCACGCAGTCTTCGCAGCCGGGGCGGCTAC   |                  | 500               | 70                         |
|             | XccRelAF10-R  | ATGCCTGCAGGTGCGACTGCGCCTGCGCCACTTC |                  |                   |                            |
|             | XccRelAF7B-F  | CGGGATCCGTGGCAATCCACTGCGG          | <i>BamHI</i>     | 1000              | 70                         |
|             | XccRelAF9S-R  | GCGTCGACCTGCGCCTGCGCCACTTC         | <i>SalI</i>      |                   |                            |
|             | XccrelA-F10   | TCCACGTAAGTGCAGGATTGAGC            |                  | 3221              | 56                         |
|             | XccrelA-R10   | CGCCGGAACACGATGACACT               |                  |                   |                            |

|        |               |                           |              |             |    |
|--------|---------------|---------------------------|--------------|-------------|----|
|        | XccrelA3-F    | CCGCGATGTGGACGAAACC       |              | 142         | 56 |
|        | XccrelA3-R    | CTTCCGCCAGATGCTGTAGATG    |              |             |    |
|        | XccrelAHB1E-F | CGGAATTCACCGTCCGCTTGCTGC  | <i>EcoRI</i> | 2800        | 68 |
|        | XccrelAHB1B-R | CGGGATCCATGCGGTGGCGTCCGTC | <i>BamHI</i> |             |    |
| pLAFR3 | pR3-conF1     | TGCCGTGCTCGTGTTTCGGGGG    |              | ~300+insert | 58 |
|        | pR3-conR1     | GAGTTAGCTCACTCATTAGG      |              |             |    |

Underlined nucleotides indicate the location of restriction sites used for cloning

**Table S3 Primers used for qPCR analysis in the current study**

| Target gene | Primer             | Sequence (5'→3')           | Final Conc. (nM) | Product size (bp) | R <sup>2</sup> | Efficiency (%) |
|-------------|--------------------|----------------------------|------------------|-------------------|----------------|----------------|
| <i>pbpA</i> | <i>pbpA</i> -F     | GACGGGCCACTCCACTTCTG       | 500              | 199               | 0.9995         | 95             |
|             | <i>pbpA</i> -R     | GCAACAACGGCGTGCTCAAC       |                  |                   |                |                |
| <i>ugpC</i> | <i>ugpC</i> -F     | AAGGTGTCCGCAAGGTCTAC<br>GA | 500              | 159               | 0.9983         | 103            |
|             | <i>ugpC</i> -R     | TGCCC GCACTGATGTCCTCC      |                  |                   |                |                |
| <i>relA</i> | <i>XccrelA3</i> -F | CCGCGATGTGGACGAAACC        | 500              | 142               | 0.9996         | 100            |
|             | <i>XccrelA3</i> -R | CTTCCGCCAGATGCTGTAGAT<br>G |                  |                   |                |                |
| <i>spoT</i> | <i>XccspoT1</i> -F | AAATCCGACGCCAGTTCTTC       | 500              | 142               | 0.9955         | 93             |
|             | <i>XccspoT1</i> -R | CGAGCCCTACATCACCCATCC      |                  |                   |                |                |

**Figure S1**

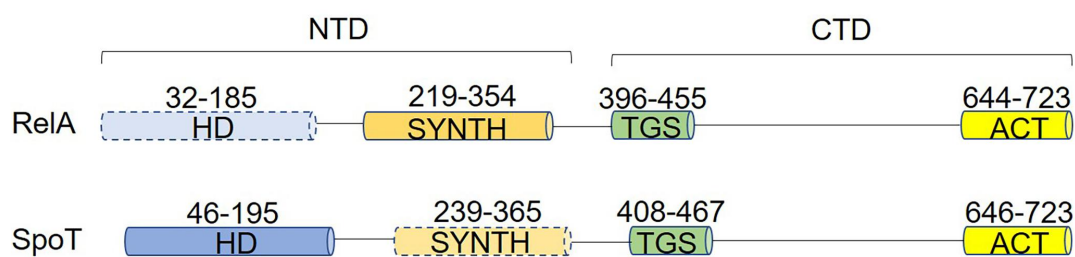

**Figure S1 Predicted domains within the RelA and SpoT homologues in *Xanthomonas campestris* pv. *campestris*.** Bioinformatic analysis using the InterPro online tool indicated that both proteins contained the ppGpp synthetase domain as well as other characteristic motifs of long RelA/SpoT homologue (RSH) proteins: HD, hydrolysis domain; SYNTH, synthesis domain; TGS, ThrRS (threonyl tRNA synthetase), GTPase, and SpoT; ACT, aspartokinase, chorismate mutase, and TyrA (prephenate dehydrogenase). The terms NTD and CTD indicate the amino-terminal domain and carboxy-terminal domain, respectively, while numbers indicate the amino acid location within the protein.

Figure S2

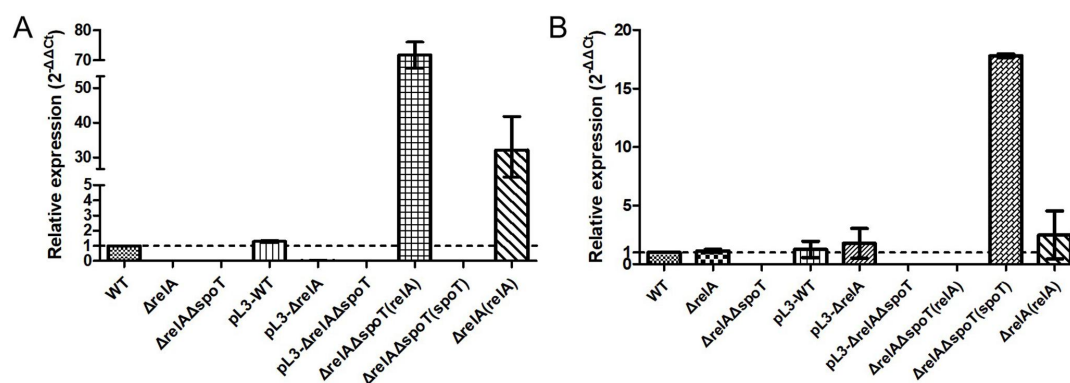

Figure S2 Gene expression of *relA* and *spoT* in *Xanthomonas campestris* pv. *campestris* deletion mutants and complementation strains during log-phase growth. The bar charts indicate the *relA* (A) and *spoT* (B) relative expression of mutant strains in comparison to wild-type strain. WT,  $\Delta relA$ , and  $\Delta relA\Delta spoT$  indicate the wild-type, single mutant and double mutant, respectively, while the prefix pL3- indicates control strains used during complementation, and the suffixes (*relA*) and (*spoT*) indicate complementation with functional copies of *relA* and *spoT*, respectively. Bars correspond to one standard deviation (SD) from the mean (n = 3).
